# Supplementary material for: Conformational analysis by UV spectroscopy: the decisive contribution of environment-induced electronic Stark effects
Source: Royal Society of Chemistry journal article supplement (doi:10.1039/d0sc06074g), 2021-01-01
Supplement: d0sc06074g1.pdf [file d0sc06074g1.pdf]

# Conformational Analysis by UV Spectroscopy: the Decisive Contribution of Environment-Induced Electronic Stark Effects

Jeremy Donon, Sana Habka, Michel Mons, Valérie Brenner, Eric Gloaguen

LIDYL, CEA, CNRS, Université Paris Saclay; CEA Saclay, Bât 522, 91191 Gif-sur-Yvette, France

## Turbomole options

The following non-default (program define) TURBOMOLE 7.0 options were used for geometry optimization and frequency calculations at the RI-B97-D3/dhf-TZVPP level:

```
$scfconv 8
$dft
  gridsize m4
  weight derivatives
$disp3
```

For electric field calculations at the RI-B97-D3(BJ)/def2-QZVPP//RI-B97-D3(BJ)-abc/dhf-TZVPP level, the following non-default options of TURBOMOLE 7.2 were used:

```
$scfconv 8
$dft
  gridsize m5
  weight derivatives
$disp3 bj abc #abc when applicable
```

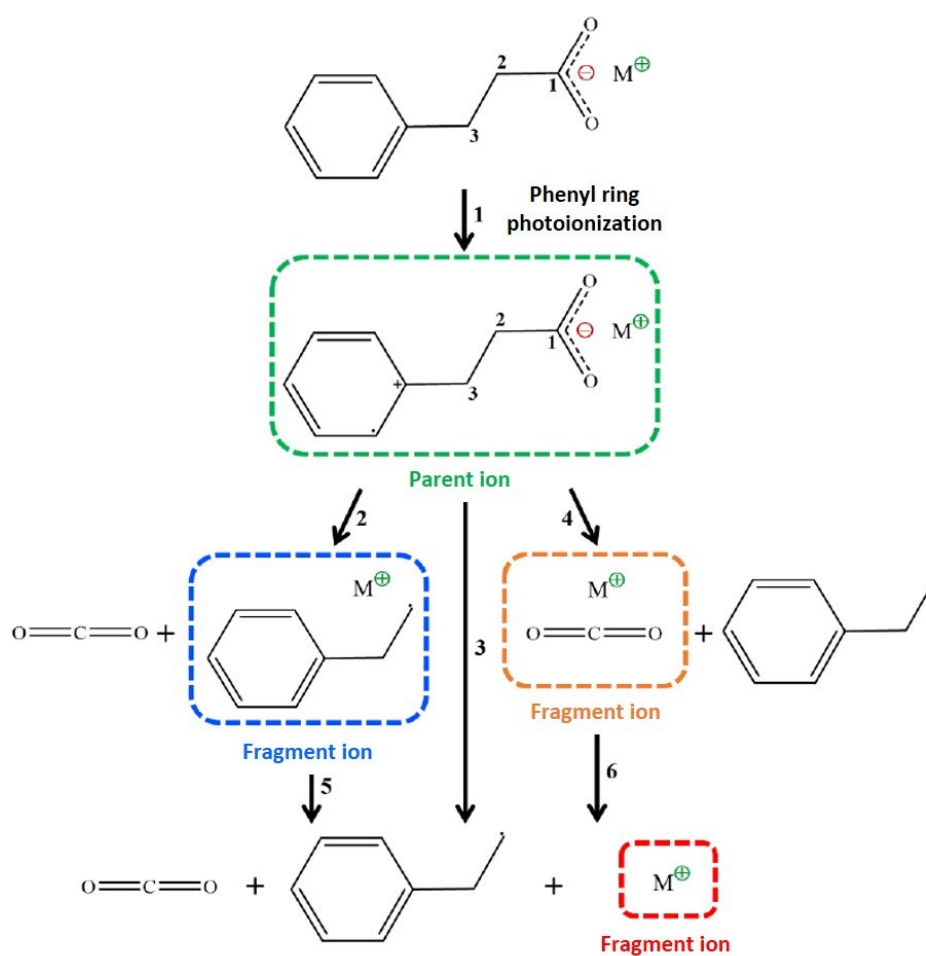

**Figure S0.** Reaction scheme featuring a photoinduced decarboxylation of the  $(M^+, BA^-)$  systems, consistent with the  $m/z$  of ions measured by mass spectrometry, *i.e.* the parent ion (green), the  $(parent-CO_2)^+$  (blue), the  $CO_2 \cdot M^+$  complex ion (orange), and the alkali cation  $M^+$  (red).

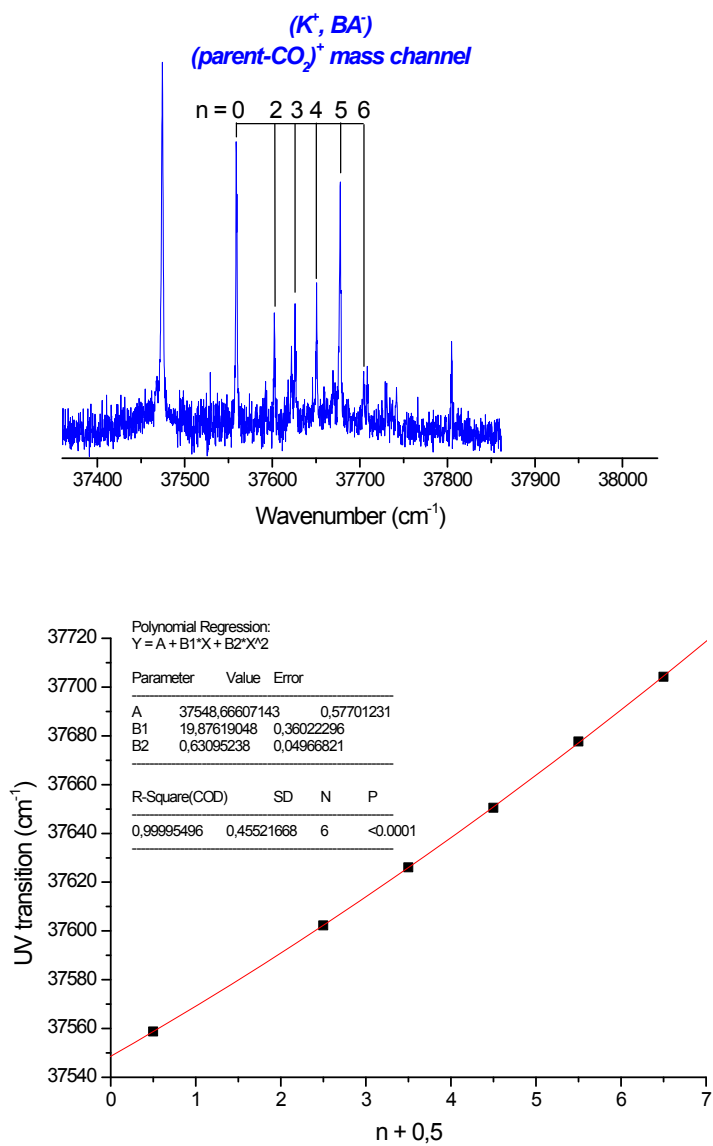

**Figure S1.** Top: Vibrational progression observed on the  $(parent-CO_2)^+$  mass channel of the  $(K^+, BA^-)$  ion pair, for which the vibrational quantum number  $n$  is assigned. Bottom: Second order polynomial regression.

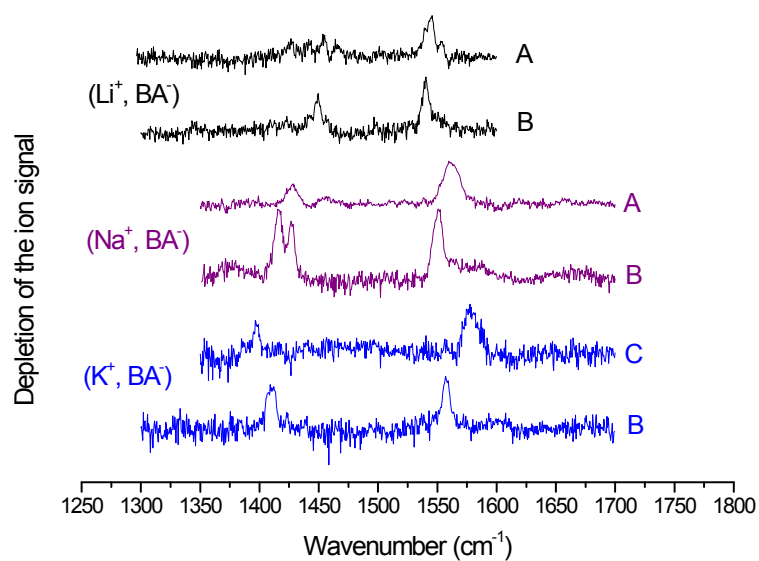

**Figure S2.** IR spectra recorded by the IR/UV technique at a UV wavelength corresponding to the most intense transition of the most intense mass channel (see Fig. 2) for every conformer considered along the  $(\text{M}^+, \text{BA}^-)$  series. While experimental frequencies of the  $\text{CO}_2^-$  stretch modes of both conformers **A** and **B** are very similar in  $(\text{Li}^+, \text{BA}^-)$  and  $(\text{Na}^+, \text{BA}^-)$ , that of **C** are quite different from **B** in  $(\text{K}^+, \text{BA}^-)$ , with a clear increase of the  $\text{CO}_2^-$  stretch modes splitting in the former.

**Table S1.** Comparison between theoretical mode-dependent scaled frequencies at the RI-B97-D3/dhf-TZVPP level and experimental frequencies of the  $\text{CO}_2^-$  stretch modes,  $\nu(\text{CO}_2^-)^{\text{sym/anti}}$ , and their difference,  $\Delta\nu(\text{CO}_2^-)$  (in  $\text{cm}^{-1}$ ). In case of multiplets (d for doublets, or q for quadruplets), the spectral range is given. O-O- $\pi$  conformers are characterized by blue shifted  $\nu(\text{CO}_2^-)^{\text{anti}}$  and a larger  $\Delta\nu(\text{CO}_2^-)$  than O-O within the same system. This behavior is also observed for conformer **C** relatively to **B** for ( $\text{K}^+$ ,  $\text{BA}^-$ ), supporting the assignment of **C** to the **gc (O-O- $\pi$ )** conformer. The evolution of  $\nu(\text{CO}_2^-)^{\text{sym}}$  is considered less reliable due to the presence of couplings blurring the comparison between harmonic calculations and experiments.

|                                         | Theory          |            |                                   |                                    |                            | Experiment |                                   |                                    |                            |
|-----------------------------------------|-----------------|------------|-----------------------------------|------------------------------------|----------------------------|------------|-----------------------------------|------------------------------------|----------------------------|
|                                         | Label           | Type       | $\nu(\text{CO}_2^-)^{\text{sym}}$ | $\nu(\text{CO}_2^-)^{\text{anti}}$ | $\Delta\nu(\text{CO}_2^-)$ | Conf.      | $\nu(\text{CO}_2^-)^{\text{sym}}$ | $\nu(\text{CO}_2^-)^{\text{anti}}$ | $\Delta\nu(\text{CO}_2^-)$ |
| <b>(Li<sup>+</sup>, BA<sup>-</sup>)</b> | ap              | O-O        | 1424                              | 1537                               | 113                        | B          | 1449.0                            | 1540.5                             | 91.5                       |
|                                         | ac              | O-O        | 1421                              | 1540                               | 119                        |            |                                   |                                    |                            |
|                                         | gc              | O-O        | 1433                              | 1542                               | 109                        | A          | q(1426-1465)                      | 1544.5                             | 99 <sup>a</sup>            |
|                                         | pl-ap           | O-O        | 1425                              | 1540                               | 115                        |            |                                   |                                    |                            |
| <b>(Na<sup>+</sup>, BA<sup>-</sup>)</b> | ap              | O-O        | 1392                              | 1554                               | 162                        | B          | d(1416-1427)                      | 1551                               | 129.5 <sup>a</sup>         |
|                                         | ac              | O-O        | 1391                              | 1553                               | 162                        |            |                                   |                                    |                            |
|                                         | gc <sup>b</sup> | O-O        | 1403                              | 1556                               | 153                        | A          | 1428.5                            | 1561                               | 132.5                      |
|                                         | gc              | O-O- $\pi$ | 1398                              | 1569                               | 171                        |            |                                   |                                    |                            |
|                                         | pl-ap           | O-O        | 1396                              | 1554                               | 158                        |            |                                   |                                    |                            |
| <b>(K<sup>+</sup>, BA<sup>-</sup>)</b>  | ap              | O-O        | 1382                              | 1562                               | 180                        | B          | 1410                              | 1557                               | 147                        |
|                                         | ac              | O-O        | 1381                              | 1562                               | 181                        |            |                                   |                                    |                            |
|                                         | gc              | O-O- $\pi$ | 1390                              | 1579                               | 189                        | C          | 1397                              | 1578                               | 181                        |
|                                         | pl-ap           | O-O        | 1380                              | 1563                               | 183                        |            |                                   |                                    |                            |
| <b>(Rb<sup>+</sup>, BA<sup>-</sup>)</b> | ap              | O-O        | 1382                              | 1558                               | 176                        |            |                                   |                                    |                            |
|                                         | ac              | O-O        | 1381                              | 1559                               | 178                        |            |                                   |                                    |                            |
|                                         | gc              | O-O- $\pi$ | 1391                              | 1575                               | 184                        |            |                                   |                                    |                            |
|                                         | pl-ap           | O-O        | 1380                              | 1560                               | 180                        |            |                                   |                                    |                            |

- The center of the multiplet is used to calculate the difference
- Partial optimization with a fixed  $\text{C}^{\text{ipso}}\text{C}^{\text{a}}\text{C}^{\text{b}}\text{C}^{\text{c}}$  angle (Table 1)

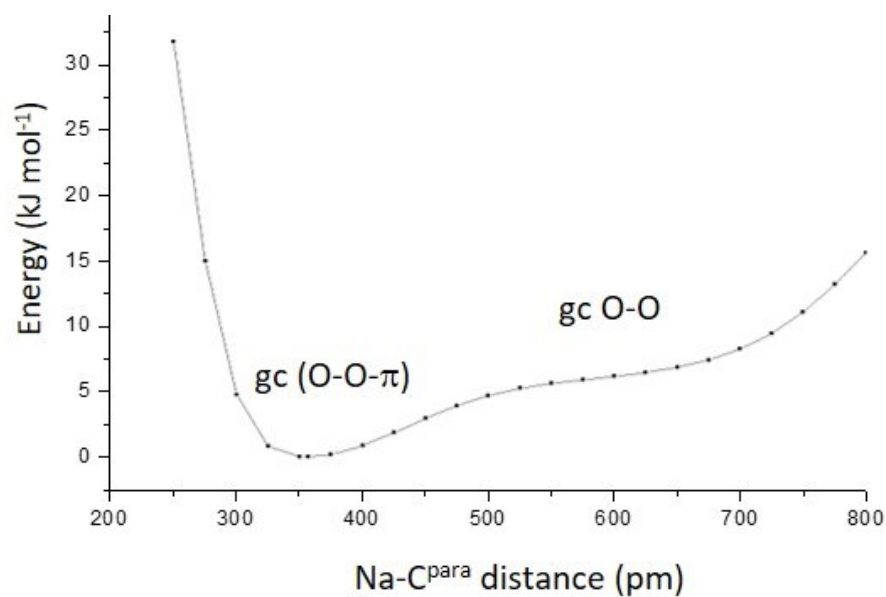

**Figure S3.** Energy profile of the ( $\text{Na}^+$ ,  $\text{BA}^-$ ) **gc** conformers along the  $\text{Na-C}^{\text{para}}$  coordinate obtained after partial optimizations at the RI-B97-D3(BJ)-abc/dhf-TZVPP. This profile shows a quite large basin, where the minimum of the potential energy surface is of O-O- $\pi$  type, whereas an inflexion is seen in the region typical of O-O conformers ( $\sim 600$  pm). Similar results were obtained for ( $\text{Li}^+$ ,  $\text{BA}^-$ ) and ( $\text{K}^+$ ,  $\text{BA}^-$ ). The experimental observation of O-O conformers for ( $\text{Li}^+$ ,  $\text{BA}^-$ ) and ( $\text{Na}^+$ ,  $\text{BA}^-$ ) suggest that the stabilization of O-O- $\pi$  conformers is overestimated by at least  $\sim 5$   $\text{kJ mol}^{-1}$  relatively to O-O conformers. This profile obtained at a rather advanced level of calculation illustrates how challenging the theoretical structural description of these systems is.

**Table S2.** The electric field  $E$  (in GV m<sup>-1</sup>) produced by the (M<sup>+</sup>, <sup>•</sup>CH<sub>2</sub>-CH<sub>2</sub>-CO<sub>2</sub><sup>-</sup>) system, calculated at the center of the phenyl ring at the RI-B97-D3(BJ)/def2-QZVPP//RI-B97-D3(BJ)-abc/dhf-TZVPP level is presented for the (M<sup>+</sup>, BA<sup>-</sup>) series. The electric fields produced by the <sup>•</sup>CH<sub>2</sub>-CH<sub>2</sub>-CH<sub>3</sub> (resp. <sup>•</sup>CH<sub>2</sub>-CH<sub>2</sub>-COOH) system in both conformers of *n*-propylbenzene (resp. benzylacetic acid) are also shown.

|                                         |                       | $\ E\ $ | $E_x$ | $E_y$ | $E_z$ |
|-----------------------------------------|-----------------------|---------|-------|-------|-------|
| <b>(Li<sup>+</sup>, BA<sup>-</sup>)</b> | ap (O-O)              | 2.65    | -2.64 | 0.00  | -0.27 |
|                                         | ac (O-O)              | 2.35    | -2.34 | 0.00  | -0.14 |
|                                         | gc (O-O)              | 2.70    | -2.66 | 0.36  | -0.27 |
| <b>(Na<sup>+</sup>, BA<sup>-</sup>)</b> | ap (O-O)              | 3.29    | -3.29 | 0.00  | -0.15 |
|                                         | ac (O-O)              | 3.01    | -3.01 | 0.00  | -0.02 |
|                                         | gc (O-O) <sup>a</sup> | 3.40    | -3.39 | -0.12 | -0.18 |
| <b>(K<sup>+</sup>, BA<sup>-</sup>)</b>  | ap (O-O)              | 3.73    | -3.73 | 0.00  | -0.06 |
|                                         | ac (O-O)              | 3.49    | -3.49 | 0.00  | 0.07  |
| <b>(Rb<sup>+</sup>, BA<sup>-</sup>)</b> | ap (O-O)              | 3.82    | -3.82 | 0.00  | -0.04 |
|                                         | ac (O-O)              | 3.58    | -3.58 | 0.00  | 0.08  |
| <b><i>n</i>-propylbenzene</b>           | a                     | 2.14    | -2.13 | 0.00  | -0.23 |
|                                         | g                     | 2.12    | -2.09 | 0.06  | -0.39 |
| <b>Benzylacetic acid</b>                | ap                    | 1.45    | -1.32 | 0.00  | 0.60  |
|                                         | gc                    | 1.53    | -1.33 | -0.60 | -0.45 |

a. Conformer resulting from a partial optimization at the RI-B97-D3/dhf-TZVPP level (Table 1 and S1).

*n*-propylbenzene

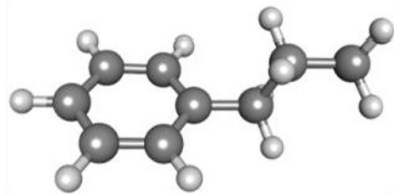

**a**

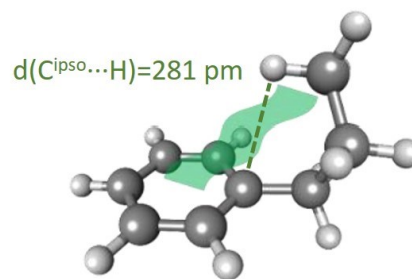

**g**

$(M^+, BA^-)$

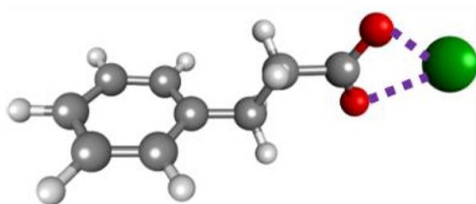

**ap (O-O)**

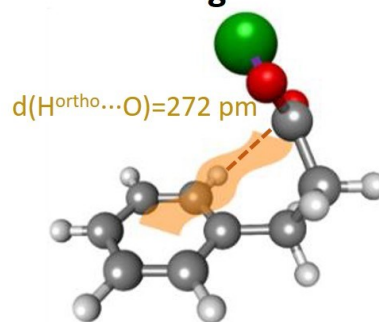

**gc (O-O)**

**Figure S4.** Interactions between the phenyl ring and the methyl (green) or the  $-CO_2^-M^+$  (orange) group in *n*-propylbenzene and  $(M^+, BA^-)$  ion pairs respectively. These interactions mainly occur in conformers where the  $C^{ipso}C^aC^bC^c$  angle is **g**, but not when it is **a**.



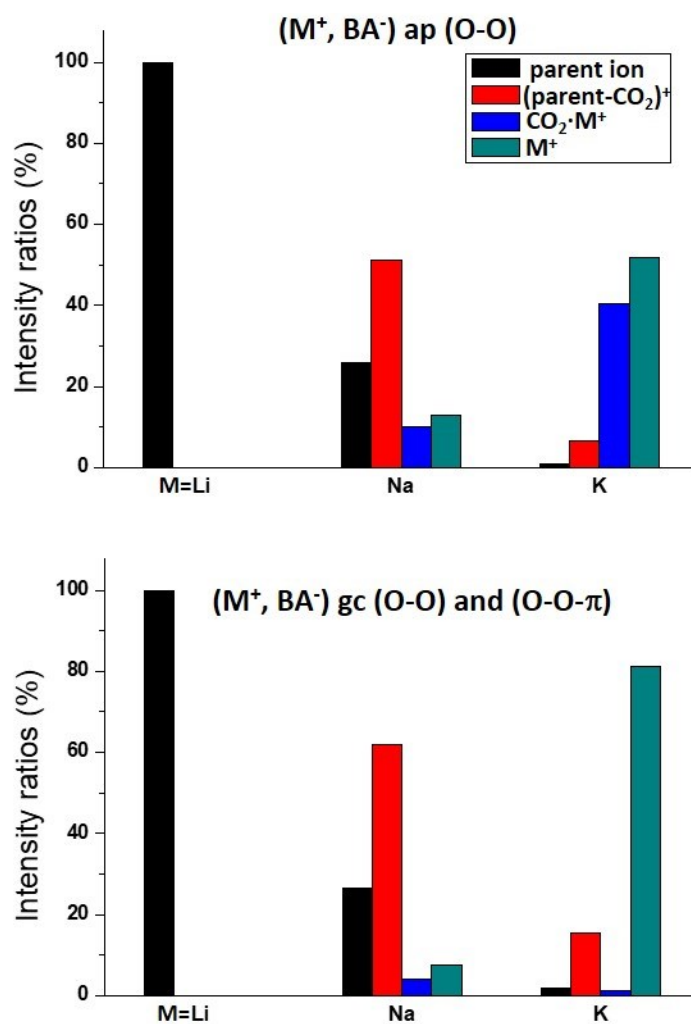

**Figure S5.** Ion signal intensity ratios between the different mass channels taken at the origin transitions of (M<sup>+</sup>, BA<sup>-</sup>) conformers **B** assigned to **ap (O-O)** (top) and **A** or **C** assigned to **gc (O-O)** or **(O-O-π)** (bottom) for M= Li, Na and K.

**Table S3.** Ionic bond energy of the ( $M^+$ ,  $AcO^-$ ) bidentate ion pairs calculated at the BSSE-corrected-Full-CCSD(T)/dhf-TZVPP//RI-B97-D3/dhf-TZVPP level<sup>1-2</sup> for  $M = Li, Na, K, Rb, Cs$ .<sup>3</sup>

| System                                | Binding energy (kJ mol <sup>-1</sup> ) |
|---------------------------------------|----------------------------------------|
| (Li <sup>+</sup> , AcO <sup>-</sup> ) | 708                                    |
| (Na <sup>+</sup> , AcO <sup>-</sup> ) | 605                                    |
| (K <sup>+</sup> , AcO <sup>-</sup> )  | 525                                    |
| (Rb <sup>+</sup> , AcO <sup>-</sup> ) | 498                                    |
| (Cs <sup>+</sup> , AcO <sup>-</sup> ) | 495                                    |

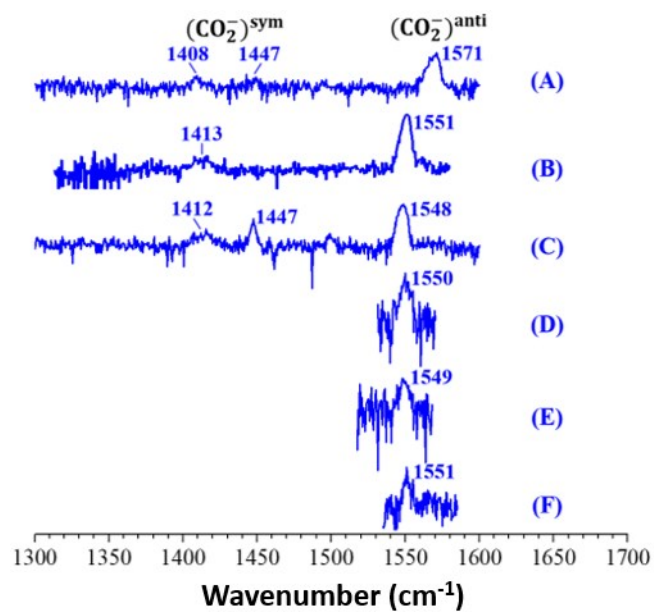

**Figure S6.** IR spectra recorded by the IR/UV technique at a UV wavelength corresponding to the most intense transition of the most intense mass channel (see Fig. 5) for every conformer of the  $(\text{Na}^+, \text{PB}^-)$  system. The antisymmetric transition of **A** is clearly blue-shifted by 20-23  $\text{cm}^{-1}$  relatively to all the other conformers.

**Table S4.** Comparison between theoretical mode-dependent scaled frequencies at the RI-B97-D3/dhf-TZVPP level and experimental frequencies of the CO<sub>2</sub><sup>-</sup> stretch modes,  $\nu(\text{CO}_2^-)^{\text{sym/anti}}$  (in cm<sup>-1</sup>). In case of multiplets (d for doublets, or t for triplets), the spectral range is given. O-O- $\pi$  conformers are characterized by blue shifted  $\nu(\text{CO}_2^-)^{\text{anti}}$  by at least 10 cm<sup>-1</sup>. A  $\sim 20$  cm<sup>-1</sup> blueshift is also observed for conformer **A** relatively to the others, supporting the assignment of **A** to the **ggc (O-O- $\pi$ )** conformer.

|                                      | Theory           |            |                                   |                                    | Experiment |                                   |                                    |
|--------------------------------------|------------------|------------|-----------------------------------|------------------------------------|------------|-----------------------------------|------------------------------------|
|                                      | Label            | Type       | $\nu(\text{CO}_2^-)^{\text{sym}}$ | $\nu(\text{CO}_2^-)^{\text{anti}}$ | Conf.      | $\nu(\text{CO}_2^-)^{\text{sym}}$ | $\nu(\text{CO}_2^-)^{\text{anti}}$ |
| (Li <sup>+</sup> , PB <sup>-</sup> ) | aap              | O-O        | 1425                              | 1537                               | D          | t(1417-1462)                      | 1538                               |
|                                      | aac              | O-O        | 1424                              | 1540                               | F          |                                   |                                    |
|                                      | agp              | O-O        | 1428                              | 1538                               | C          | 1452                              | 1537                               |
|                                      | gap              | O-O        | 1427                              | 1535                               |            |                                   |                                    |
|                                      | gac <sup>a</sup> | O-O        |                                   |                                    | E          |                                   | 1537                               |
|                                      | ggc              | O-O        | 1432                              | 1535                               |            |                                   |                                    |
|                                      | gḡc             | O-O- $\pi$ | 1433                              | 1555                               | A          | 1453                              | 1557                               |
|                                      | pl-aap           | O-O        | 1426                              | 1537                               | B          | 1447                              | 1537                               |
| (Na <sup>+</sup> , PB <sup>-</sup> ) | aap              | O-O        | 1394                              | 1555                               | D          |                                   | 1550                               |
|                                      | aac              | O-O        | 1395                              | 1552                               | F          |                                   | 1551                               |
|                                      | agp              | O-O        | 1399                              | 1555                               | C          | d(1412-1447)                      | 1548                               |
|                                      | gap              | O-O        | 1394                              | 1552                               |            |                                   |                                    |
|                                      | gac <sup>a</sup> | O-O        |                                   |                                    | E          |                                   | 1549                               |
|                                      | ggc              | O-O        | 1407                              | 1552                               |            |                                   |                                    |
|                                      | gḡc             | O-O- $\pi$ | 1409                              | 1568                               | A          | d(1408-1447)                      | 1571                               |
|                                      | pl-aap           | O-O        | 1395                              | 1551                               | B          | 1413                              | 1551                               |

a. Partial optimization with a fixed dihedral angle around the C<sup>c</sup>C<sup>d</sup> bond (see Table 2)

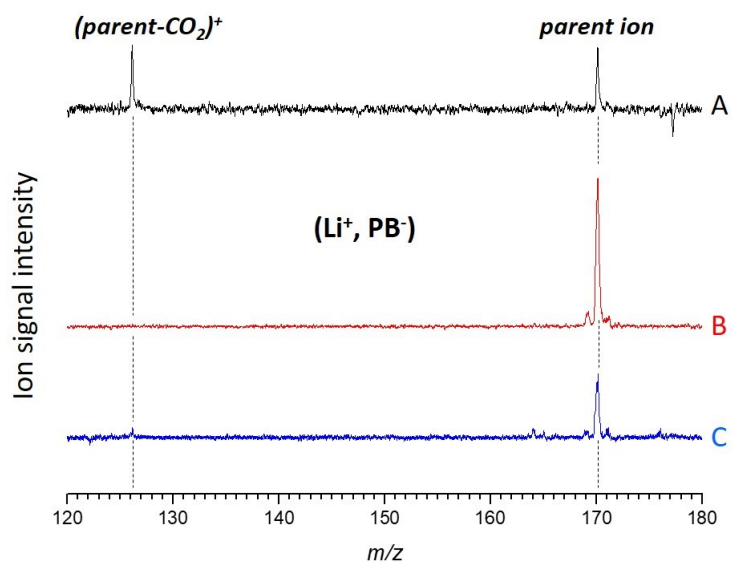

**Figure S7.** Mass spectra of  $(Li^+, PB^-)$  resulting from the difference between spectra taken in resonance with transitions **A**, **B** and **C**, and off resonance. Despite the mass spectrum of conformer **B** has the highest signal-to-noise parent ion intensity, it does not show any  $(parent-CO_2)^+$  signal, while this fragmentation channel is clearly detected on **A** or **C**.

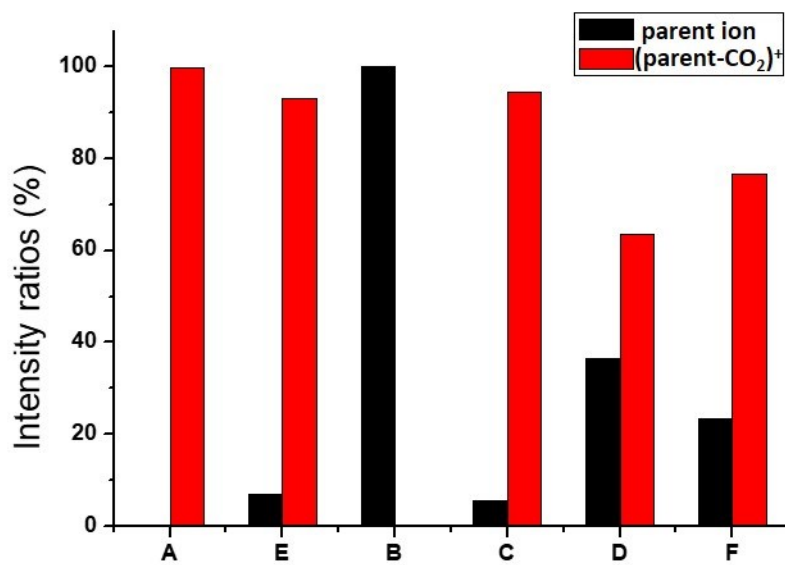

**Figure S8.** Ion signal intensity ratios between the parent ion and (parent-CO<sub>2</sub>)<sup>+</sup> mass channels taken at the origin transitions of (Na<sup>+</sup>, PB<sup>-</sup>) conformers. Please note that the CO<sub>2</sub>-Na<sup>+</sup> and Na<sup>+</sup> channels are not taken into account.

**Table S5.** The electric field  $E$  (in GV m<sup>-1</sup>) produced by the (M<sup>+</sup>, •CH<sub>2</sub>-CH<sub>2</sub>-CH<sub>2</sub>-CO<sub>2</sub><sup>-</sup>) system, calculated at the center of the phenyl ring at the RI-B97-D3(BJ)/def2-QZVPP//RI-B97-D3(BJ)-abc/dhf-TZVPP level is presented for the (M<sup>+</sup>, PB<sup>-</sup>) series. The electric field produced by the •CH<sub>2</sub>-CH<sub>2</sub>-CH<sub>2</sub>-CH<sub>3</sub> system in both conformers of *n*-butylbenzene is also shown.

|                                         |              | $\ E\ $ | $E_x$ | $E_y$ | $E_z$ |
|-----------------------------------------|--------------|---------|-------|-------|-------|
| <b>(Li<sup>+</sup>, PB<sup>-</sup>)</b> | aap (O-O)    | 2.54    | -2.54 | 0.00  | -0.02 |
|                                         | aac (O-O)    | 2.39    | -2.38 | 0.00  | -0.18 |
|                                         | agp (O-O)    | 2.60    | -2.60 | 0.15  | -0.10 |
|                                         | gap (O-O)    | 2.35    | -2.32 | 0.01  | -0.34 |
|                                         | ggc (O-O)    | 2.40    | -2.34 | 0.51  | -0.16 |
|                                         | pl-aap (O-O) | 2.55    | -2.55 | -0.02 | -0.01 |
| <b>(Na<sup>+</sup>, PB<sup>-</sup>)</b> | aap (O-O)    | 2.99    | -2.99 | 0.01  | 0.05  |
|                                         | aac (O-O)    | 2.85    | -2.84 | 0.01  | -0.13 |
|                                         | agp (O-O)    | 3.03    | -3.03 | 0.13  | 0.01  |
|                                         | gap (O-O)    | 2.72    | -2.72 | 0.07  | -0.14 |
|                                         | ggc (O-O)    | 2.84    | -2.77 | 0.62  | 0.04  |
|                                         | pl-aap (O-O) | 3.00    | -3.00 | 0.02  | 0.01  |
| <b><i>n</i>-butylbenzene</b>            | aa           | 2.21    | -2.20 | 0.00  | -0.22 |
|                                         | ag           | 2.17    | -2.16 | 0.01  | -0.22 |
|                                         | ga           | 2.15    | -2.11 | 0.08  | -0.38 |
|                                         | gg           | 2.14    | -2.10 | 0.02  | -0.39 |

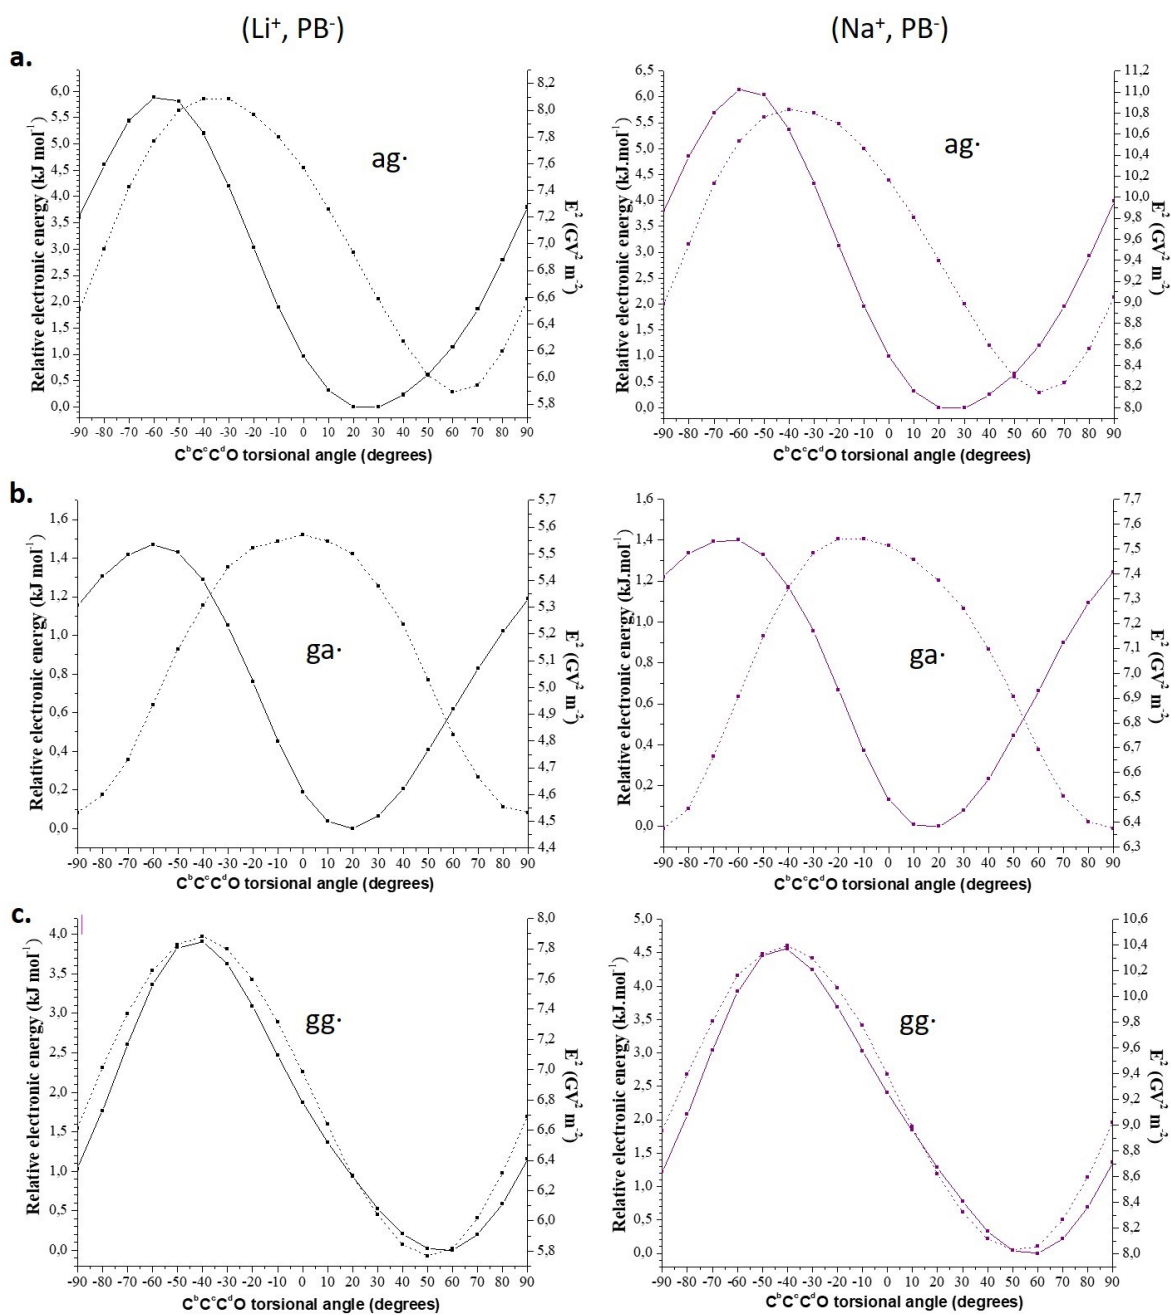

**Figure S9.** Energy profiles (solid lines) and electric field profiles (dotted lines) along the  $C^bC^cC^dO$  dihedral angle for the  $ag\cdot$  (a),  $ga\cdot$  (b) and  $gg\cdot$  (c) conformers of  $(Li^+, PB^-)$  (left) and  $(Na^+, PB^-)$  (right).



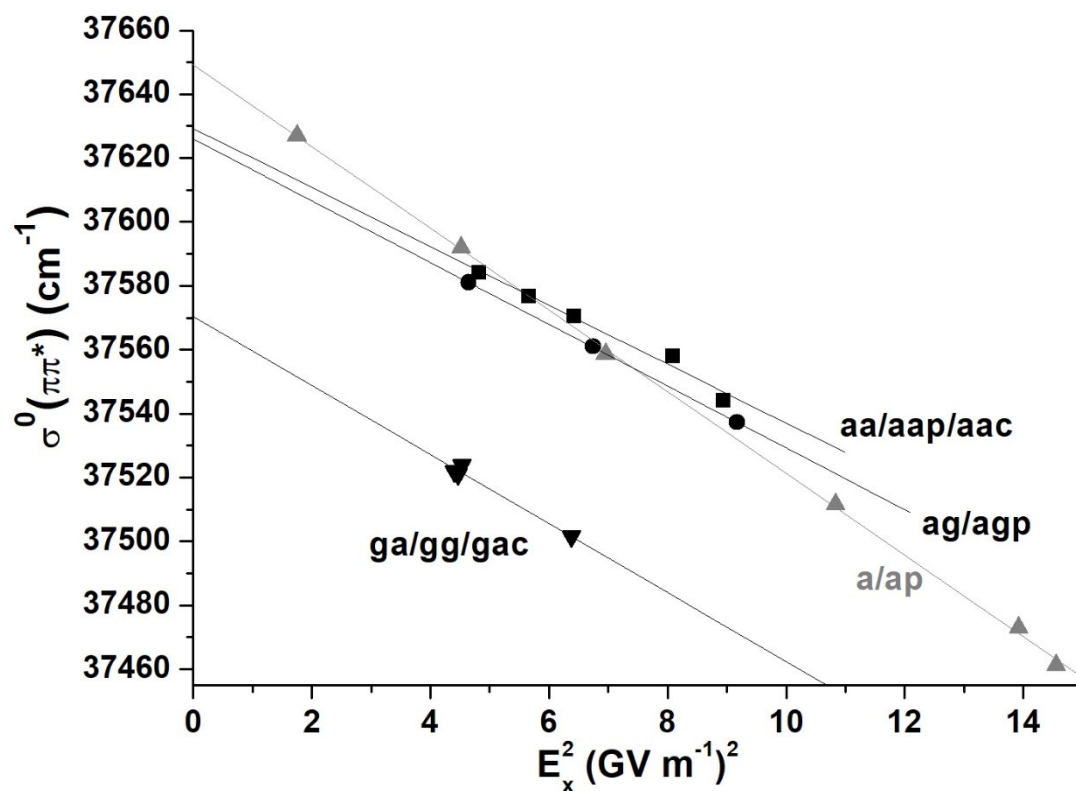

**Figure S10.** Experimental origin electronic transitions reported as a function of the square of the calculated electric field component  $E_x$  generated by the chain ( $\cdot\text{CH}_2\text{-R}$ , R depending on the system) at the center of the phenyl ring for all conformers involved in a quadratic Stark effect for *n*-propylbenzene, *n*-butylbenzene, benzylacetic acid, ( $\text{M}^+$ ,  $\text{BA}^-$ ) for  $\text{M} = \text{Li}, \text{Na}, \text{K}$  and  $\text{Rb}$ , ( $\text{Li}^+$ ,  $\text{PB}^-$ ) and ( $\text{Na}^+$ ,  $\text{PB}^-$ ). The four sets of conformers are distinguished by their symbols and linearly fitted.

## References

1. Boys, S. F.; Bernardi, F., Calculation of small molecular interactions by differences of separate total energies. Some procedures with reduced errors. *Mol. Phys.* **1970**, *19* (4), 553-566.
2. Raghavachari, K.; Trucks, G. W.; Pople, J. A.; Headgordon, M., A fifth-order perturbation comparison of electron correlation theories. *Chem. Phys. Lett.* **1989**, *157* (6), 479-483.
3. Habka, S. Spectroscopie optique de paires d'ions: De la caractérisation des modèles en phase gazeuse à l'identification des paires d'ions en solution. Université Paris-Saclay, 2017.
